# Supplementary material for: Expansion of Circulating Tumor Cells from Patients with Locally Advanced Pancreatic Cancer Enable Patient Derived Xenografts and Functional Studies for Personalized Medicine
Source: MDPI journal article supplement (doi:10.3390/cancers12041011), 2020-04-20
Supplement: s1 [file s1]

## Supplementary Materials:

# Expansion of Circulating Tumor Cells from Patients with Locally Advanced Pancreatic Cancer Enable Patient Derived Xenografts and Functional Studies for Personalized Medicine

Lianette Rivera-Báez, Ines Lohse, Eric Lin, Shreya Raghavan, Sarah Owen, Ramdane Harouaka, Kirk Herman, Geeta Mehta, Theodore S. Lawrence, Meredith A. Morgan, Kyle C. Cuneo and Sunitha Nagraath

**Table 1.** Pancreatic cancer patient characteristics.

| Patient | Sex             | Age | Diagnosis         | Stage    | CTC Number/mL | EMT-Like CTC/mL | Epithelial-Like CTC/mL |
|---------|-----------------|-----|-------------------|----------|---------------|-----------------|------------------------|
| P.1*    | m <sup>#</sup>  | 53  | PDAC <sup>§</sup> | T4N0M0** | 14            | 11              | 3                      |
| P.2*    | f <sup>##</sup> | 74  | PDAC              | T4N0M0   | 44            | 44              | 0                      |
| P.3*    | f               | 54  | PDAC              | T4N0M0   | 20            | 16              | 4                      |
| P.4     | m               | 64  | PDAC              | T4N0M0   | 10            | 6               | 4                      |
| P.5     | m               | 53  | PDAC              | T4N0M0   | 21            | 11              | 9                      |
| P.6     | f               | 73  | PDAC              | T4N0M0   | 7             | 7               | 0                      |
| P.7     | f               | 60  | PDAC              | T3N0M0   | 19            | 17              | 2                      |
| P.8     | f               | 69  | PDAC              | T4N0M0   | 49            | 49              | 0                      |
| P.9     | m               | 61  | PDAC              | T4N0M0   | 8             | 6               | 2                      |
| P.10    | f               | 50  | PDAC              | T4N0M0   | 51            | 45              | 6                      |

\* CTC cell lines were established for these patients, <sup>#</sup> male, <sup>##</sup> female, <sup>§</sup> pancreatic ductal adenocarcinoma, \*\*TNM classification of tumors of the exocrine pancreas: T4, tumor extends directly into any of the following: stomach, spleen, colon, adjacent large vessels; N0, no regional lymph node metastasis; M0, no distant metastasis.

**Table 2.** CTC number and characteristics change in response to treatment.

| Patient | Visit | Treatment            | CTC Number/mL | EMT-Like CTC/mL | Epithelial-Like CTC/mL |
|---------|-------|----------------------|---------------|-----------------|------------------------|
| P.1     | V1    | untreated            | 14            | 11              | 3                      |
|         | V2    | Gemcitabine, AZD1778 | 11            | 9               | 2                      |
| P.2     | V1    | untreated            | 44            | 44              | 0                      |
|         | V2    | Gemcitabine, AZD1778 | 3             | 3               | 0                      |
| P.4     | V1    | untreated            | 10            | 6               | 4                      |
|         | V2    | Gemcitabine, AZD1778 | 2             | 2               | 0                      |

**Table 3.** CTC characteristics in CTC cultures.

| Patient | Adherent Culture |                         | Spheroid Culture |                         |
|---------|------------------|-------------------------|------------------|-------------------------|
|         | EMT-Like CTC (%) | Epithelial-Like CTC (%) | EMT-Like CTC (%) | Epithelial-Like CTC (%) |
| P.1     | 87%              | 13%                     | 57%              | 43%                     |
| P.2     | 12%              | 88%                     | 37%              | 63%                     |
| P.3     | 85%              | 15%                     | 66%              | 34%                     |

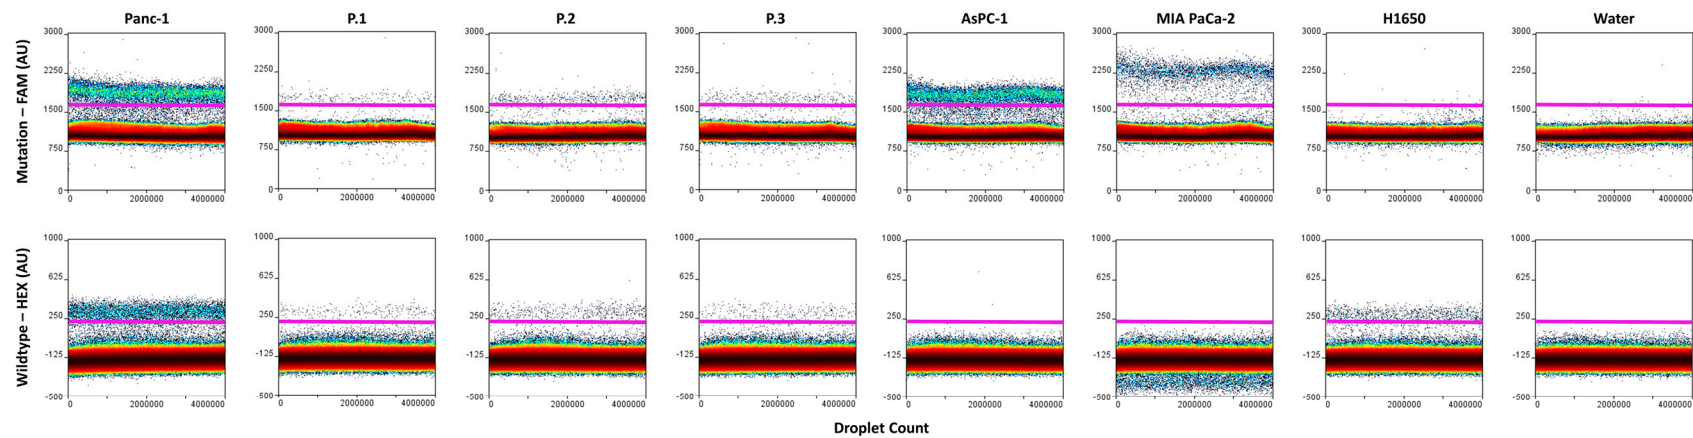

|                      | Panc-1       | P.1          | P.2          | P.3          | AsPC-1     | MIA PaCa-2 | H1650      | Water |
|----------------------|--------------|--------------|--------------|--------------|------------|------------|------------|-------|
| <b>Mutant KRAS</b>   | +            | +            | +            | +            | +          | +          | -          | -     |
| <b>Wildtype KRAS</b> | +            | +            | +            | +            | -          | -          | +          | -     |
|                      | Heterozygous | Heterozygous | Heterozygous | Heterozygous | Homozygous | Homozygous | Homozygous | N/A   |

**Figure 1.** KRAS G12/G13 mutation detection in CTC-derived cell lines. Digital PCR plots of CTC-derived cell lines compared to control cell lines, with mutant (FAM) droplets (top) and wildtype (HEX) droplets (bottom) compared to droplet count. The corresponding KRAS G12/G13 mutation status is shown below.
